# Supplementary material
Source: PubMed Central journal article supplement (PMC7888290)
Supplement: Supp_Data.pdf [file Supp_Data.pdf]

## Supplementary Data

### Supplementary Methods: Survey of Ophthalmic Clinician's Attitudes Toward Telemedicine During the COVID-19 Pandemic

#### Demographics

1. What is your position at KEC?
  - Faculty physician
  - House officer physician
  - Optometrist
  - Advanced practice provider (e.g., PA, NP)
  - Other \_\_\_\_\_
2. How long have you been in practice?
  - <5 years
  - >5–10 years
  - >10–15 years
  - >15 years
3. What is your specialty?
  - General ophthalmology
  - Cornea
  - Oculoplastics
  - Pediatrics
  - Glaucoma/neuro-ophthalmology
  - Retina
  - Vision care/contact lens/optometry
  - Other \_\_\_\_\_

#### Practice

1. Before the coronavirus epidemic, did you provide any of the following telemedicine services? (check all that apply)
  - Phone visits
  - Video visits
  - Interprofessional e-consultations
  - None
2. Since the coronavirus epidemic began, how many times have you conducted consults with other health care providers that included photographs or videos provided in person, through e-mail, or online?
  - Never
  - 1–2 times
  - 3–10 times
  - ≥11 times
3. Since the coronavirus epidemic began, how many times have you received photographs from patients through e-mail or online?
  - Never
  - 1–2 times
  - 3–10 times
  - ≥11 times
4. Since the coronavirus epidemic began, how many times have you conducted video visits with patients?
  - Never
  - 1–2 times
  - 3–10 times
  - ≥11 times
5. Since the coronavirus epidemic began, how many times have you conducted phone visits with patients?
  - Never
  - 1–2 times
  - 3–10 times
  - ≥11 times
6. Based on your experience with telemedicine since the coronavirus epidemic began, how would you describe your confidence in using remote screening for eye care?
  - Not at all confident
  - Somewhat confident
  - Confident
  - Extremely confident
  - N/A
7. Since the coronavirus epidemic began, how do you feel about telemedicine utilization in ophthalmology?
  - Highly underutilized
  - Somewhat underutilized
  - Utilized appropriately
  - Somewhat overutilized
  - Highly overutilized
8. How likely are you to continue to provide eye telemedicine services (video visits, phone visits, e-consultations) for the next 1 year?
  - Unlikely
  - Somewhat unlikely
  - Unsure
  - Somewhat likely
  - Likely

## Description of Telehealth-Based Eye Care Visit Types and Compensation During COVID-19

| VISIT TYPE <sup>a,b</sup>      | VISIT DESCRIPTION                                                                                                                                              | REIMBURSEMENT <sup>c</sup>    |
|--------------------------------|----------------------------------------------------------------------------------------------------------------------------------------------------------------|-------------------------------|
| Phone visit                    | Live interaction of a patient and a clinician over the telephone used in situations that a patient was not able or not willing to participate in a video visit | \$46–110                      |
| Video visit                    | Live interaction of a patient and a clinician over secure videoconference                                                                                      | New patient: \$46–211         |
|                                |                                                                                                                                                                | Established patient: \$23–148 |
| Interprofessional consultation | Interprofessional phone/internet/electronic health record assessment and management service provided by a consultative clinician to the requesting clinician   | \$18–73                       |

Before COVID-19, telehealth-based eye care services were conducted primarily for diabetic retinopathy screening and oculoplastics postoperative visits.

<sup>a</sup>Visit type selected at the discretion of the treating clinician unless referring clinician requested an interprofessional consultation only (clinician-to-clinician encounter over telephone, video, or HIPAA compliant e-mail).

<sup>b</sup>Ophthalmological examination elements were included at the discretion of the treating clinician. Specific technologies available to clinicians included: high-contrast visual acuity checked using available smartphone apps and intraocular pressure checked using a portable device by a drive-thru service.

<sup>c</sup>Based on the Centers for Medicare and Medicaid Services Fee Schedule, which varies based on time spent and/or complexity. Effective April 30, 2020, CMS increased the allowable reimbursement by cross-walking values for phone visits to evaluation and management codes; this may vary by geographic region.

HIPAA, Health Insurance Portability and Accountability Act.
