# Supplementary material
Source: PubMed Central journal article supplement (PMC7888290)
Supplement: Supp_Table1.pdf [file Supp_Table1.pdf]

**Supplementary Table S1. Characteristics of All Clinicians Receiving an E-mail Survey**

|                                                  | TOTAL, NO. (%) |
|--------------------------------------------------|----------------|
| Clinical position                                | <i>N</i> =97   |
| Ophthalmologist or clinical ophthalmology fellow | 79 (81.4)      |
| Optometrist                                      | 16 (16.5)      |
| Other <sup>a</sup>                               | 2 (2.1)        |
| How long have you been in practice?              | <i>N</i> =97   |
| <5 years                                         | 23 (23.7)      |
| >5–10 years                                      | 20 (20.6)      |
| >10–15 years                                     | 14 (14.4)      |
| >15 years                                        | 40 (41.2)      |
| What is your specialty?                          | <i>N</i> =97   |
| Cornea                                           | 10 (10.3)      |
| General ophthalmology                            | 17 (17.5)      |
| Glaucoma/neuro-ophthalmology                     | 16 (16.5)      |
| Oculoplastics                                    | 7 (7.2)        |
| Pediatrics                                       | 12 (12.4)      |
| Retina                                           | 22 (22.7)      |
| Vision care/contact lens/optometry               | 13 (13.4)      |

<sup>a</sup>Clinicians who see patients with a supervising faculty physician (e.g., orthoptists, advanced care practitioners). None responded to the survey.
